# Supplementary material
Source: MDPI journal article supplement (https://www.mdpi.com/2076-3417/12/3/1712)

## SUPPLEMENTARY MATERIAL

**Table S1.** UPLC-MS/MS MRM conditions for phenolic compounds

| Analyte         | Measured ion       | RT (min) | Precursor ion ( <i>m/z</i> ) | Product ions ( <i>m/z</i> )                                | CV (V) | CE (eV)  |
|-----------------|--------------------|----------|------------------------------|------------------------------------------------------------|--------|----------|
| Citric acid     | [M-H] <sup>-</sup> | 0.56     | 191.1                        | 86.9 <sup>b</sup> /110.9 <sup>a</sup>                      | 24     | 20/14    |
| Pyrogallol      | [M-H] <sup>-</sup> | 1.57     | 125.0                        | 68.9 <sup>b</sup> /78.8 <sup>a</sup>                       | 37     | 18/14    |
| Caffeic acid    | [M-H] <sup>-</sup> | 6.07     | 179.0                        | 78.9 <sup>b</sup> /134.9 <sup>a</sup>                      | 29     | 24/14    |
| Coumarin        | [M+H] <sup>+</sup> | 9.25     | 147.1                        | 64.9 <sup>b</sup> /90.9 <sup>a</sup> /102.9 <sup>b</sup>   | 35     | 32/22/16 |
| Hyperoside      | [M-H] <sup>-</sup> | 9.28     | 464.1                        | 259.9 <sup>b</sup> /270.9 <sup>b</sup> /300.1 <sup>a</sup> | 45     | 42/40/28 |
| Rutin           | [M-H] <sup>-</sup> | 9.30     | 609.1                        | 254.9 <sup>b</sup> /271.0 <sup>b</sup> /300.1 <sup>a</sup> | 59     | 52/48/38 |
| Naringin        | [M-H] <sup>-</sup> | 9.31     | 579.5                        | 124.9 <sup>b</sup> /151.0 <sup>a</sup>                     | 58     | 60/42    |
| 2-coumaric acid | [M-H] <sup>-</sup> | 9.35     | 162.9                        | 91.0 <sup>b</sup> /119.0 <sup>a</sup>                      | 47     | 28/16    |
| Didymin         | [M-H] <sup>-</sup> | 9.81     | 593.1                        | 163.8 <sup>b</sup> /285.0 <sup>a</sup> /309.1 <sup>b</sup> | 57     | 58/28/28 |
| Naringenin      | [M-H] <sup>-</sup> | 9.92     | 271.1                        | 106.9 <sup>b</sup> /118.9 <sup>b</sup> /150.9 <sup>a</sup> | 51     | 26/26/18 |
| Isorhamnetin    | [M+H] <sup>+</sup> | 10.32    | 317.5                        | 152.9 <sup>b</sup> /302.0 <sup>a</sup>                     | 49     | 32/24    |

<sup>a</sup> Quantitation transition; <sup>b</sup> Qualifier transition; RT = Retention Time; CV = Cone Voltage; CE = Collision Energy.

**Table S2.** Total phenolic content (TPC) and antioxidant activity of *C. australasica* L. peel and pulp fractions were obtained using different solvents.

|             | TPC (mg GAE/100 g<br>d.w.) | SD    | FRAP (mg TE/100 g<br>d.w.) | SD   |
|-------------|----------------------------|-------|----------------------------|------|
| peel hexane | 63.425                     | 0.021 | 0.20                       | 0.00 |
| peel EtAc   | 265.954                    | 0.035 | 176.43                     | 0.15 |
| peel BuOH   | 215.155                    | 0.086 | 148.15                     | 0.10 |
| peel water  | 175.490                    | 0.056 | 43.34                      | 0.04 |
| pulp hexane | 0.267                      | 0.002 | 0.20                       | 0.00 |
| pulp EtAc   | 149.390                    | 0.031 | 38.40                      | 0.04 |
| pulp BuOH   | 223.034                    | 0.040 | 66.73                      | 0.09 |
| pulp water  | 23.078                     | 0.013 | 4.24                       | 0.00 |

Data are expressed as mean  $\pm$  standard deviation (SD), (n=3), BuOH = butanol, EtAc = ethyl acetate

**Figure S1.** MS/MS fragments of ononin-O-acetate (peak 10) found in the EtAc fraction of *C. australasica* L.

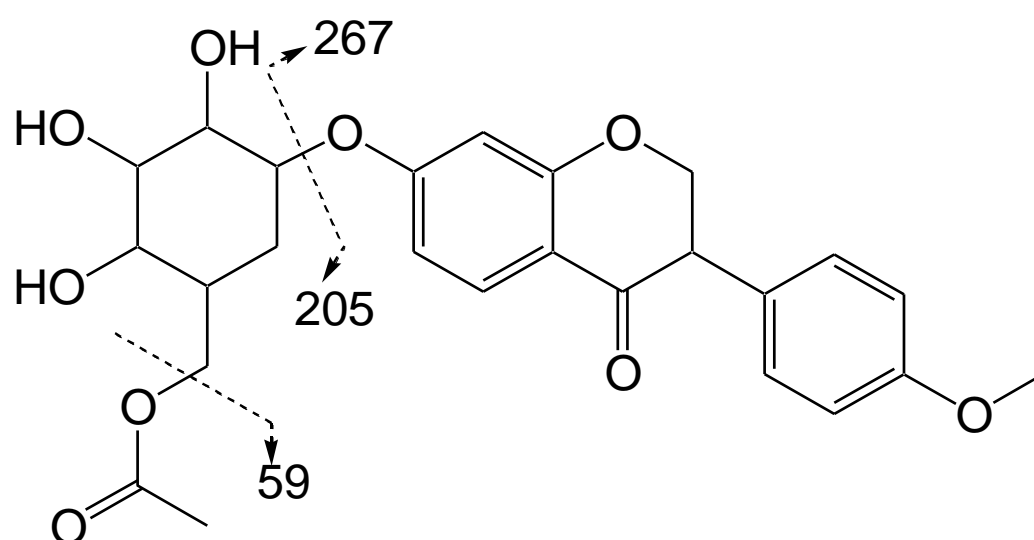

Supplement: s1 [file s1]
